# Supplementary material
Source: Springer Nature journal article supplement (https://www.springermedizin.de/resource/supplementary/12936_2012_2599_MOESM9_ESM.pdf/9542970)

MQ EC50 concentration (ng/mL) deciles

Proportions of cured

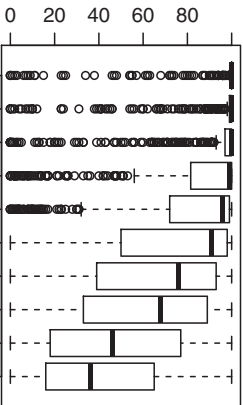

ARS EC50 concentration (ng/mL) deciles

Proportions of cured

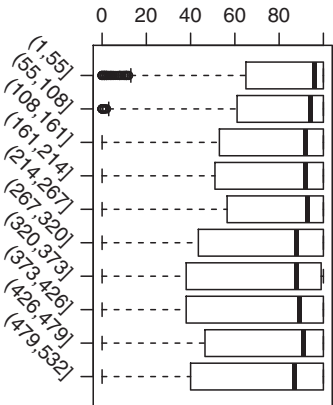

MQ  $K_{max}$  deciles

Proportions of cured

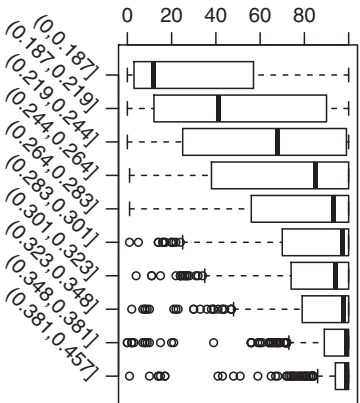

ARS  $K_{max}$  deciles

Proportions of cured

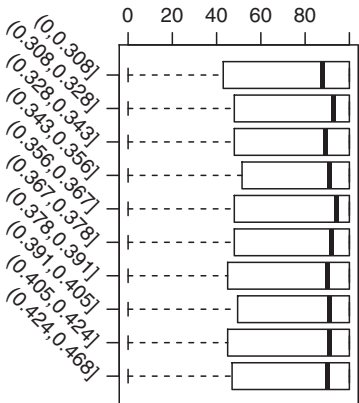

Supplement: MOESM9 [file 9542970]
